# Supplementary material for: Math Anxiety Is Related to Math Difficulties and Composed of Emotion Regulation and Anxiety Predisposition: A Network Analysis Study
Source: MDPI journal article supplement (doi:10.3390/brainsci11121609), 2021-12-05

## Supplementary Materials

**Supplementary Figure S1.** Bootstrapped confidence intervals of the edge weights in the network.

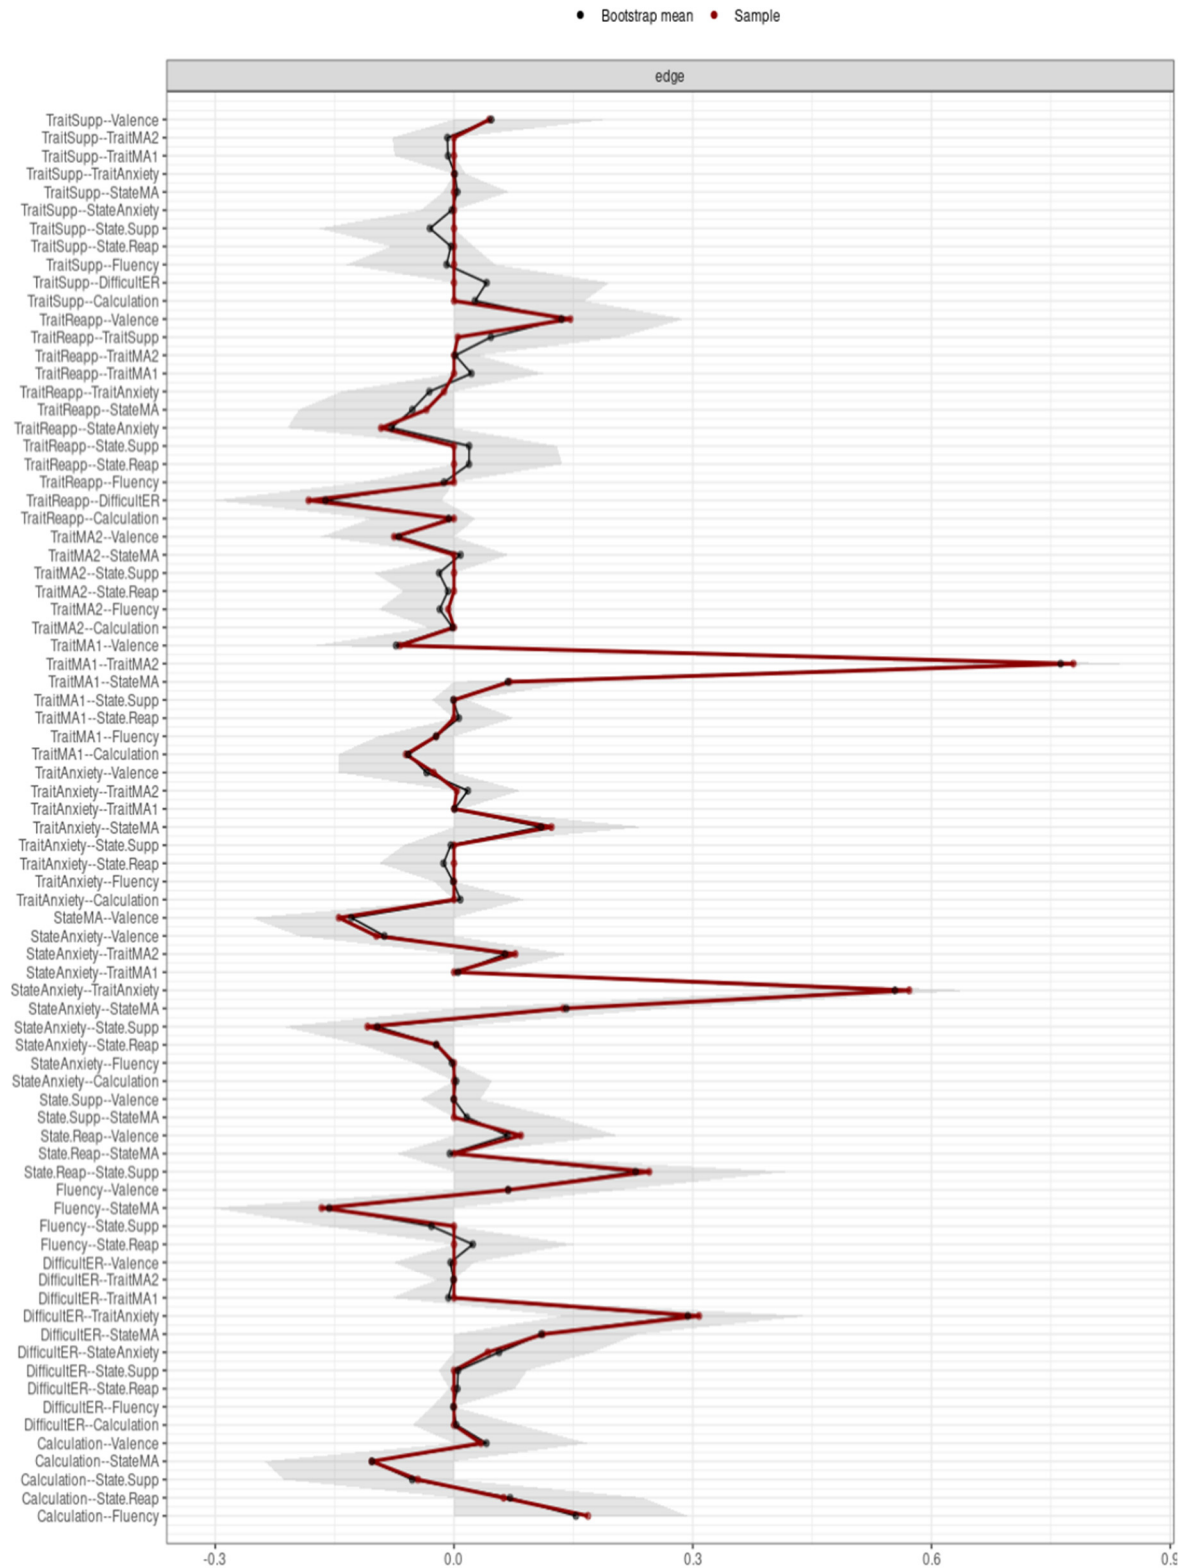

Supplement: s1 [file s1]
